# Supplementary material for: Ginkgo biloba extract for prevention of acute mountain sickness: a systematic review and meta-analysis of randomised controlled trials
Source: PubMed Central journal article supplement — BMJ Open. 2018 Aug 17;8(8):e022005. doi: 10.1136/bmjopen-2018-022005 (PMC6104799; doi:10.1136/bmjopen-2018-022005), 2018-08-17
Supplement: bmjopen-2018-022005supp001.pdf [file bmjopen-2018-022005supp001.pdf]

The full search strategy for Pubmed is as followings:

We use the following search string: ("Ginkgo biloba"[Mesh] or "ginkgo"[tiab]) AND( "Altitude Sickness"[Mesh] or "Altitude Sickness"[tiab] or "mountain"[tiab])

Supplementary Table 1. Secondary outcomes of included studies

|                           |         | Incidence of severe AMS | Headache                              | Severe headache | Oxygen saturation | Pulmonary edema             | Adverse events                               |
|---------------------------|---------|-------------------------|---------------------------------------|-----------------|-------------------|-----------------------------|----------------------------------------------|
| Roncin, 1996              | GBE     | X                       | 22/22 (100%)                          | 0/22 (0%)       | X                 | AMS-R >0.6<br>3/21 (13.6%)  | GBE(18.2%) is less urine than Placebo(77.3%) |
|                           | Placebo | X                       | 22/22 (100%)                          | 0/22 (0%)       | X                 | AMS-R >0.6<br>18/22 (81.8%) |                                              |
| Gertsch, 2002             | GBE     | 2/12 (16.7%)            | X                                     | 1/12 (8%)       | 81%               | X                           | No side effect in GBE                        |
|                           | Placebo | 9/14 (64.3%)            | X                                     | 1/14 (7%)       | 80%               | X                           |                                              |
| Gertsch, 2004             | GBE     | 23/124 (18%)            | 72/124 (58%)                          | 24/124 (19%)    | 79.5%             | Non occurred                | No side effect in GBE                        |
|                           | Placebo | 22/119 (18%)            | 63/119 (53%)                          | 16/119 (13%)    | 82.1% P<0.01      |                             |                                              |
| Chow, 2005                | GBE     | X                       | GBE is 5% less than placebo           |                 | X                 | Non occurred                | No side effect in GBE                        |
|                           | Placebo | X                       |                                       |                 | X                 |                             |                                              |
| Moraga, 2007              | GBE     | X                       | LLS score, headache item<br>0.19±0.41 |                 | 92±2%             | X                           | X                                            |
|                           | Placebo | X                       | 1.28±0.14 P<0.05                      |                 | 84±3% P<0.01      | X                           | X                                            |
| Leadbetter, 2009(Study 1) | GBE     | 0/21 (0%)               | X                                     | X               | X                 | X                           | X                                            |
|                           | Placebo | 3/19 (16%)              | X                                     | X               | X                 | X                           | X                                            |
| Leadbetter, 2009(Study 2) | GBE     | 3/15 (20%)              | X                                     | X               | X                 | X                           | X                                            |
|                           | Placebo | 4/22 (18%)              | X                                     | X               | X                 | X                           | X                                            |

AMS: Acute mountain sickness ; AMS-R: the Environmental Symptom Questionnaire III acute mountain sickness-Respiratory (AMS-R) score; GBE: ginkgo biloba extract; LLS: Lake Louise Score; X: not mentioned in the study.

Supplementary Table 2. Number of participants and enrolled studies in each subgroup

| Subgroup                              | Number of participants |
|---------------------------------------|------------------------|
| <i>Low risk of bias studies</i>       | 357                    |
| Gertsch, 2004                         |                        |
| Chow, 2005                            |                        |
| Leadbetter, 2009                      |                        |
| <i>Starting altitude below 2500m</i>  | 208                    |
| Roncin, 1996                          |                        |
| Gertsch, 2002                         |                        |
| Chow, 2005                            |                        |
| Moraga, 2007                          |                        |
| Leadbetter, 2009                      |                        |
| <i>3–5 days prior to ascent</i>       | 114                    |
| Chow, 2005                            |                        |
| Leadbetter, 2009                      |                        |
| <i>0–2 days prior to ascent</i>       | 337                    |
| Roncin, 1996                          |                        |
| Gertsch, 2002                         |                        |
| Gertsch, 2004                         |                        |
| Moraga, 2007                          |                        |
| <i>Dosage less than 200mg per day</i> | 94                     |
| Roncin, 1996                          |                        |
| Gertsch, 2002                         |                        |
| Moraga, 2007                          |                        |
| <i>Dosage more than 200mg per day</i> | 357                    |
| Gertsch, 2004                         |                        |
| Chow, 2005                            |                        |
| Leadbetter, 2009                      |                        |
